# Supplementary material
Source: Royal Society of Chemistry journal article supplement (https://www.rsc.org/suppdata/books/178262/9781782621676/bk9781782621676.pdf)

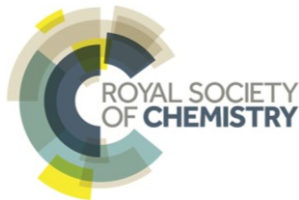

## CORRECTION

978-1-78262-167-6

*The Microbes Fight Back*

By Laura Bowater

Published by Royal Society of Chemistry

The following acknowledgement should be included in the caption to Figure 4.1:

© Microbiology Society, Microbiology Today, *Archaea and the meaning of life*, Hannah Marriott and Thorsten Allers.

The author and the Royal Society of Chemistry apologise for this error and any consequent inconvenience caused.

Thomas Graham House  
Science Park, Milton Road  
Cambridge CB4 0WF, UK

**Tel** +44 (0) 1223 420066

**Email** [books@rsc.org](mailto:books@rsc.org)

**[www.rsc.org](http://www.rsc.org)**

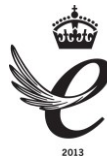

Supplement: Supplementary file 1 [file bk9781782621676.pdf]
